# Supplementary material for: Beneficial Activities of Alisma orientale Extract in a Western Diet-Induced Murine Non-Alcoholic Steatohepatitis and Related Fibrosis Model via Regulation of the Hepatic Adiponectin and Farnesoid X Receptor Pathways
Source: MDPI journal article supplement (doi:10.3390/nu14030695), 2022-02-07
Supplement: s1 [file s1]

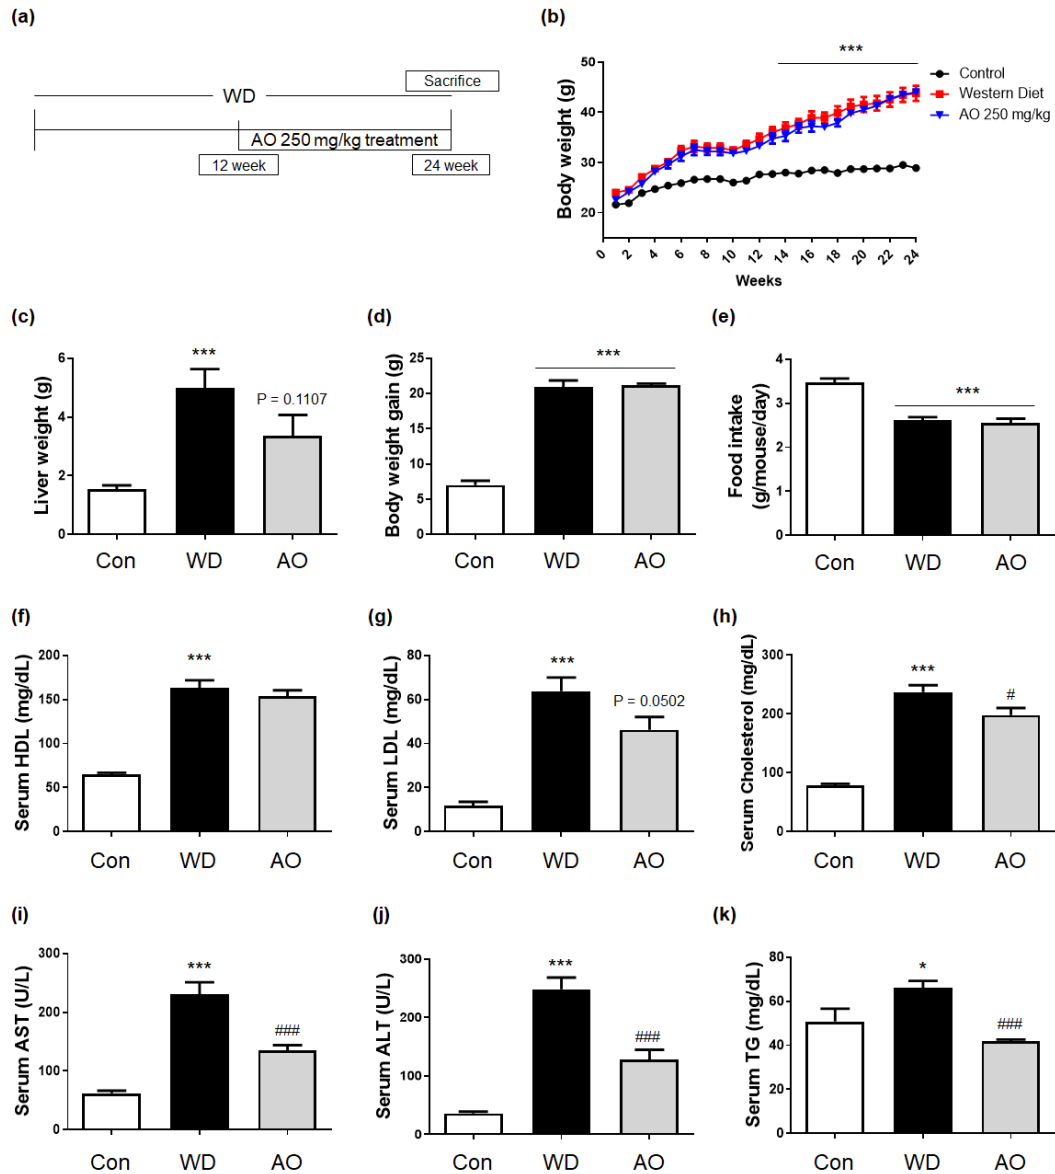

**Supplementary Figure S1.** Effects of *Alisma orientale* extract (AO, 250 mg/kg) on 24-week duration western-diet (WD) administrated mice. AO was treated from 12-week to 24-weeks. (a) Scheme of the experiment. (b) The body weight changes in mice following WD-induced. (c) The liver weight and (d) body weight gain were measured. (e) The food intake of mice during the trial was measured. The serum levels of (f) high-density lipoprotein (HDL), (g) low-density lipoprotein (LDL), (h) cholesterol, (i) aspartate transaminase (AST), (j) alanine transaminase (ALT), and (k) triglycerides (TG) were analyzed. \*  $p < 0.05$ , \*\*\*  $p < 0.001$  vs control group; #  $p < 0.05$ , ###  $p < 0.001$  vs WD-treated group ( $n = 12$  per group)
